# Supplementary material for: The nature of the different environmental sensitivity of symmetrical and unsymmetrical cyanine dyes: an experimental and theoretical study
Source: Royal Society of Chemistry journal article supplement (doi:10.1039/c2cp42122d), 2012-01-01
Supplement: c2cp42122d.pdf [file c2cp42122d.pdf]

## **Supporting Information**

### **The Nature of Environmental Sensitivity about Symmetrical and Unsymmetrical Cyanine Dyes: Experimental and Theoretical Study**

Jianfang Cao, Tong Wu, Chong Hu, Tao Liu, Wen Sun, Jiangli Fan<sup>a</sup> and Xiaojun Peng<sup>\*a</sup>

- 1. Tests of functionals**
- 2. Calculated the spectra and molecular orbitals of the free state and the bound state**
- 3. Potential-energy curves of Cyanine Dyes**
- 4. XYZ coordinates (angstrom)**

## 1. Tests of functionals

A test with a large number of functionals was performed for photochemical properties for the TO-1. The results obtained with B97D, HFS, and HFB functionals are consistent with experimental data (502 nm). B97D, HFS, and HFB functionals were performed for photochemical properties for the Cy. The results obtained with HFB functional are nearly actual experiment. Therefore, we selected the HFB functional for our study.

| Functional | Calcd<br>$\lambda$ (nm) | Functional | calcd<br>$\lambda$ (nm) | Functional  | calcd<br>$\lambda$ (nm) |
|------------|-------------------------|------------|-------------------------|-------------|-------------------------|
| B3LYP      | 449.25                  | BHandH     | 398.93                  | X3LYP       | 446.05                  |
| B3P86      | 444.86                  | BHandHLYP  | 400.82                  | LC-wPBE     | 402.16                  |
| B3PW91     | 445.99                  | BMK        | 424.44                  | CAM-B3LYP   | 416.50                  |
| B1B95      | 439.35                  | M06        | 440.43                  | VSXC        | 484.67                  |
| mPW1PW91   | 437.06                  | M06HF      | 415.23                  | HCTH        | 484.74                  |
| mPW1LYP    | 441.05                  | M062X      | 427.67                  | HCTH93      | 485.59                  |
| mPW1PBE    | 437.06                  | tHCTHhyb   | 456.55                  | HCTH147     | 485.73                  |
| mPW3PBE    | 446.10                  | HSEh1PBE   | 442.06                  | HCTH407     | 484.74                  |
| B98        | 446.04                  | HSE2PBE    | 440.80                  | tHCTH       | 481.93                  |
| B971       | 448.14                  | PBEh1PBE   | 437.39                  | M06L        | 455.40                  |
| B972       | 443.01                  | wB97XD     | 416.03                  | <b>B97D</b> | <b>490.42</b>           |
| PBE1PBE    | 437.51                  | wB97       | 402.03                  | <b>HFS</b>  | <b>501.07</b>           |
| B1LYP      | 440.91                  | wB97X      | 406.04                  | XAlpha      | 488.19                  |
| O3LYP      | 462.65                  | TPSSh      | 454.71                  | <b>HFB</b>  | <b>513.09</b>           |

## 2. Calculated the spectra of the free state and the bound state

The absorption maxima for all four dyes shift to the red in 90% glycerol (a high viscosity solution) or upon binding to DNA. The absorption maxima for all four dyes shift slightly to the red upon binding to DNA/ in glycerol, indicative of the lower dielectric environment of the stacked base pairs/glycerol.<sup>27</sup> In addition, environment-induced conformational changes can also induce spectral shifts for all four dyes.

In water (low viscosity) solution, cyanine dyes are in free states and can rotate freely; however, in viscous or DNA microenvironment, rotation and twisting of molecules are restricted. So unrestrained for bonds, angles, or dihedral angles for free states were applied in the geometry optimization calculations. In contrast, we restricted the rotation of the methine chain on behalf of the bound states in the geometry optimization calculations. We calculated the absorption and emission spectra of the two states using the TD-DFT/HFB/TZVP method with COSMO solvation model, and compared them with the experimental data. The results in Table R1 show that computational absorption bands of all the dyes are well consistent with the experimental data. By computing the spectra of the two states, we found that the bound state spectrum is red shift compared to the free state.

The molecular orbitals involved in the  $S_0 \rightarrow S_1$  transitions have been calculated for all the molecules in Figure R1, Compared with free states, the HOMO energy slightly increased or no change, yet the LUMO energy decreased in the bound state for cyanines, which leads to a decrease in the HOMO-LUMO gap, in agreement with the bathochromic shifts seen experimentally. Besides, the fact that viscosity has a relatively bigger influence on the LUMO energy indicates that the electronic excited state is more sensitive to viscosity. In conclusion, environment-induced conformational changes played an important role in red shifts of absorption/emission maximum for all four dyes.

Table S1 Absorption and emission maxima of different cyanine dyes for free state and bound state. Free state with no constrains for bonds, angles, or dihedral angles in the geometry optimization calculations. The bound state limited the rotation of the methine chain in the geometry optimization calculations.

| Compound | free state     |     | bound state    |     |
|----------|----------------|-----|----------------|-----|
|          | $\lambda$ (nm) |     | $\lambda$ (nm) |     |
|          | abs            | flu | abs            | flu |
| TO-1     | 513            | 543 | 525            | 569 |
| TO-3     | 589            | 637 | 590            | 645 |
| Cy1      | 478            | 549 | 480            | 557 |
| Cy3      | 534            | 587 | 543            | 594 |
| Cy5      | 591            | 636 | 593            | 641 |

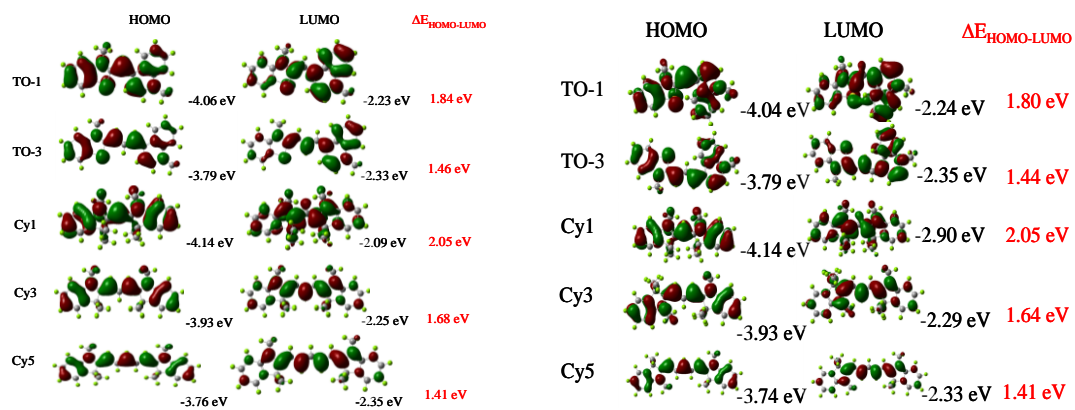

Figure S1 HOMO and LUMO for each of the cyanines in the free state(left) and in the bound state(right).

### 3. Potential-energy curves of Cyanine Dyes

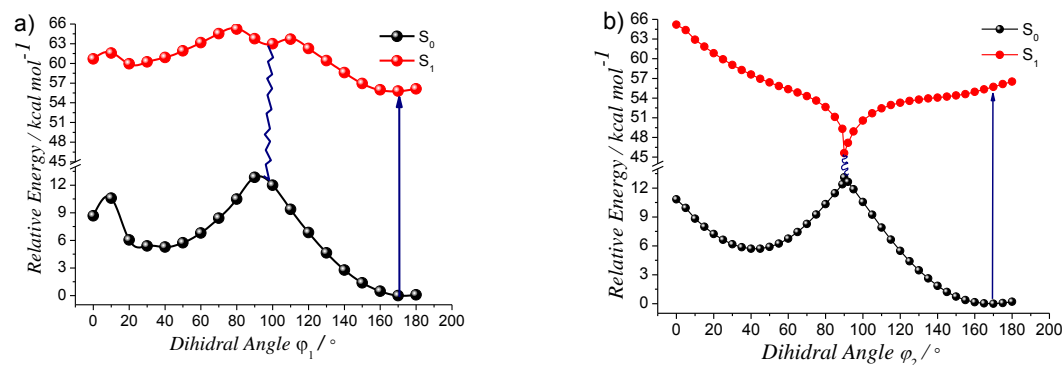

Figure S2 Potential-energy curves of the S<sub>0</sub> (black) and S<sub>1</sub> (red) states for TO-1 (a)  $\phi_1$  and (b)  $\phi_2$  as functions of the corresponding dihedral angles, calculated at the TD-DFT/HFB/TZVP level with COSMO solvation model.

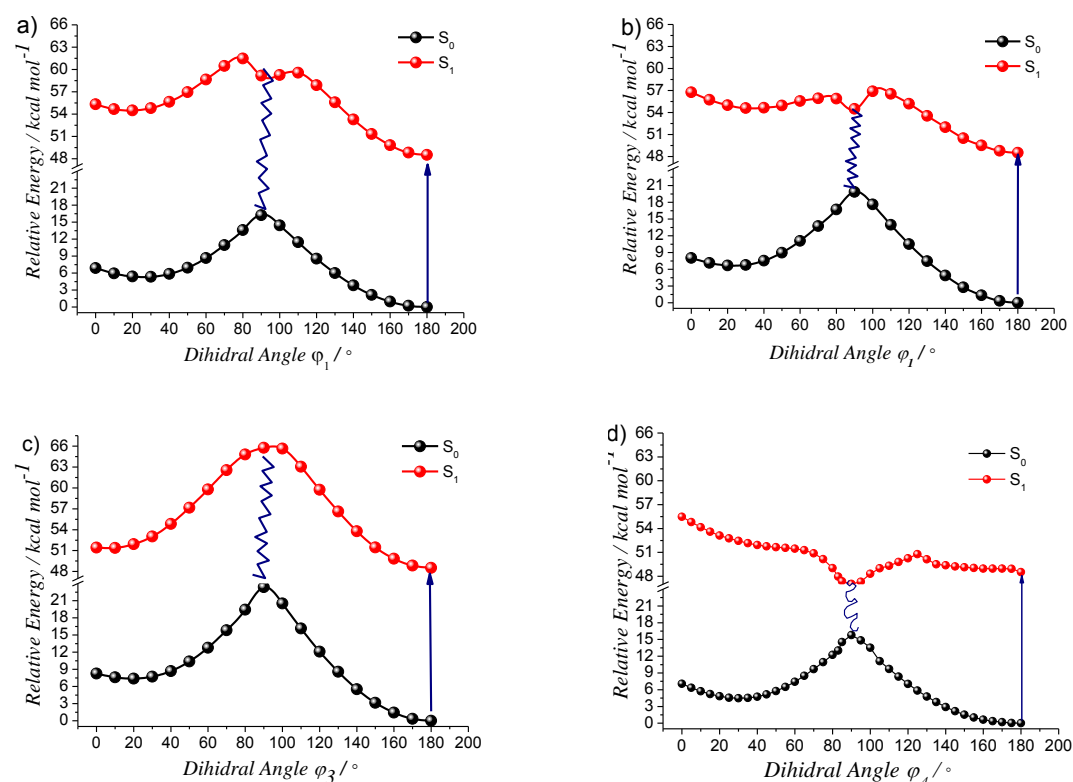

Figure S3 Potential-energy curves of the S<sub>0</sub> (black) and S<sub>1</sub> (red) states for TO-3 (a)  $\phi_1$ , (b)  $\phi_2$  (c)  $\phi_3$  and (d)  $\phi_4$  as functions of the corresponding dihedral angles, calculated at the TD-DFT/HFB/TZVP level with COSMO solvation model.

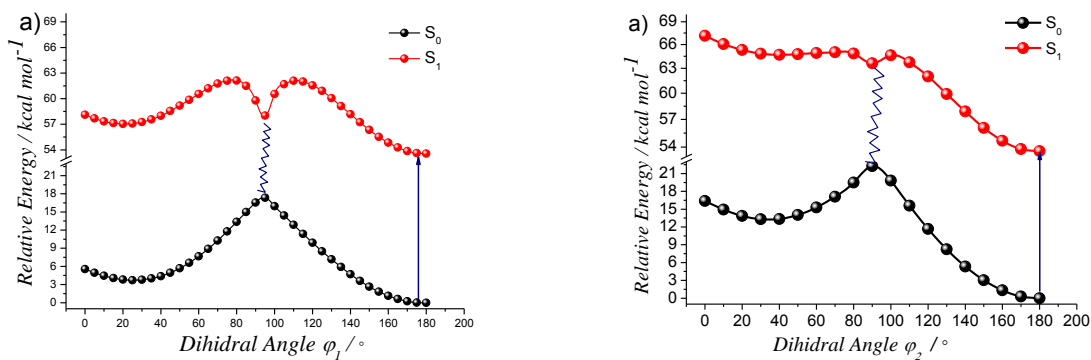

Figure S4 Potential-energy curves of the  $S_0$  (black) and  $S_1$  (red) states for Cy3 (a)  $\phi_1$  and (b)  $\phi_2$  as functions of the corresponding dihedral angles, calculated at the TD-DFT/HFB/TZVP level with COSMO solvation model.

Table S2 Activation energies of  $S_1$  and energy gaps between the  $S_0$  and  $S_1$  States for Cy3 studied in this work for rotation around different dihedral angles ( $\phi_1$  and  $\phi_2$ ) in the  $S_0$  and  $S_1$  States

| Cy3                                        | $\phi_1$ | $\phi_2$ |
|--------------------------------------------|----------|----------|
| $E_a$ (kcal·mol <sup>-1</sup> )            | 8.54     | 11.05    |
| $E_{\text{gap}}$ (kcal·mol <sup>-1</sup> ) | 43.21    | 42.25    |

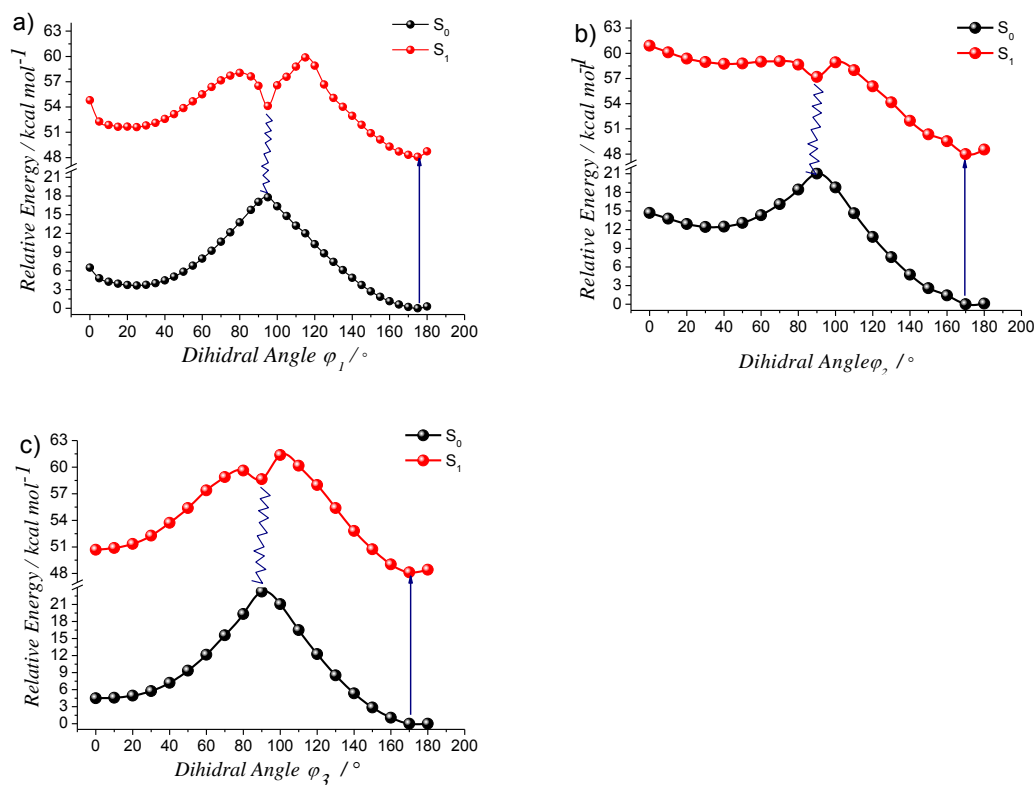

Figure S5 Potential-energy curves of the  $S_0$  (black) and  $S_1$  (red) states for Cy5 (a)  $\phi_1$ , (b)  $\phi_2$  and (c)  $\phi_3$  as functions of the corresponding dihedral angles, calculated at the TD-DFT/HFB/TZVP

level with COSMO solvation model.

Table S3 Activation energies of  $S_1$  and energy gaps between the  $S_0$  and  $S_1$  States for TO-3 studied in this work for rotation around different dihedral angles ( $\varphi_1$ ,  $\varphi_2$  and  $\varphi_3$ ) in the  $S_0$  and  $S_1$  States.

| Cy5                                        | $\varphi_1$ | $\varphi_2$ | $\varphi_3$ |
|--------------------------------------------|-------------|-------------|-------------|
| $E_a$ (kcal·mol <sup>-1</sup> )            | 11.78       | 12.94       | 14..33      |
| $E_{\text{gap}}$ (kcal·mol <sup>-1</sup> ) | 36.31       | 36.16       | 35.39       |

## 4. XYZ coordinates (angstrom) and SCF Energies (a.u.)

Note: upper case letters before the atomic coordinates indicate the atomic symbol of the atoms involved in the calculations.

TO-1 in the  $S_0$  state

Energy = -1236.2107

|   |             |             |             |
|---|-------------|-------------|-------------|
| C | -4.75111900 | -1.59863300 | -0.41866800 |
| C | -6.00460400 | -0.93279800 | -0.35907700 |
| C | -6.06481700 | 0.46439100  | -0.08228100 |
| C | -4.88790100 | 1.22463900  | 0.14502000  |
| C | -3.62554300 | 0.56156900  | 0.09599300  |
| C | -3.57886100 | -0.83624200 | -0.19600700 |
| N | -2.33006200 | 1.12960500  | 0.31112500  |
| C | -1.24933900 | 0.25374600  | 0.13576900  |
| S | -1.86570600 | -1.42406900 | -0.23312400 |
| C | 0.10504100  | 0.67069300  | 0.17243300  |
| C | 1.32907000  | -0.09297300 | 0.14162600  |
| C | 2.64545700  | 0.59021400  | -0.05189700 |
| C | 3.88431500  | -0.18124900 | -0.02160200 |
| N | 3.83187900  | -1.59194000 | 0.17439700  |
| C | 2.61299200  | -2.21023900 | 0.33741000  |
| C | 1.39970200  | -1.51989000 | 0.32491600  |
| C | 2.76511800  | 2.00755900  | -0.29073800 |
| C | 4.01130800  | 2.63491400  | -0.46284900 |
| C | 5.21173200  | 1.86379600  | -0.40702300 |
| C | 5.15111800  | 0.47520900  | -0.19397800 |
| C | -2.13271700 | 2.57876700  | 0.69042400  |
| C | 5.09417300  | -2.43313300 | 0.21160800  |
| H | -4.68958700 | -2.67510700 | -0.63721300 |
| H | -6.93082200 | -1.50193800 | -0.53188800 |
| H | -7.04093200 | 0.97233500  | -0.04610800 |
| H | -4.96294100 | 2.30093200  | 0.34805000  |
| H | 0.22007200  | 1.75728100  | 0.21633000  |
| H | 2.64299400  | -3.29497500 | 0.49953800  |
| H | 0.50515800  | -2.12007600 | 0.52061000  |
| H | 1.86264700  | 2.62786700  | -0.35481600 |
| H | 4.05772800  | 3.71948100  | -0.64580800 |
| H | 6.19091100  | 2.34984300  | -0.53793000 |
| H | 6.08361100  | -0.10045100 | -0.16294700 |
| H | -1.79591300 | 3.16316200  | -0.18994900 |
| H | -1.38327900 | 2.64595100  | 1.50060200  |
| H | -3.08813800 | 2.98340400  | 1.06039500  |



|   |            |             |             |
|---|------------|-------------|-------------|
| H | 4.79898900 | -3.48248600 | 0.37994300  |
| H | 5.74712000 | -2.09585100 | 1.03946100  |
| H | 5.63021500 | -2.34994900 | -0.75341900 |

TO-1 in the  $S_1$  state

Energy = -1236.18910

|   |             |             |             |
|---|-------------|-------------|-------------|
| C | -3.95218500 | -0.62367300 | -2.00429800 |
| C | -5.32197700 | -0.35738400 | -1.78335000 |
| C | -5.77987300 | 0.13916300  | -0.51607600 |
| C | -4.88799900 | 0.37921900  | 0.54680400  |
| C | -3.49309100 | 0.11704200  | 0.34019500  |
| C | -3.04465500 | -0.38538900 | -0.93934400 |
| N | -2.44088800 | 0.28966400  | 1.26133400  |
| C | -1.16214600 | -0.06016200 | 0.76495000  |
| S | -1.27113000 | -0.64707300 | -0.95681500 |
| C | 0.03705700  | 0.00705300  | 1.45879500  |
| C | 1.38084200  | -0.41265300 | 0.89185000  |
| C | 2.28436900  | 0.54798500  | 0.25520700  |
| C | 3.59726400  | 0.09202600  | -0.21329500 |
| N | 3.96091200  | -1.28547700 | -0.02975100 |
| C | 3.08834100  | -2.17229800 | 0.63963100  |
| C | 1.83703100  | -1.75385700 | 1.09393000  |
| C | 1.95898300  | 1.93933800  | 0.06417900  |
| C | 2.85933100  | 2.83947500  | -0.55924700 |
| C | 4.12220000  | 2.38024000  | -1.01277600 |
| C | 4.48887600  | 1.01408700  | -0.83843600 |
| C | -2.61996600 | 0.80657700  | 2.67500600  |
| C | 5.28791600  | -1.80251500 | -0.51613000 |
| H | -3.59371400 | -1.00543100 | -2.97090600 |
| H | -6.04645800 | -0.53328300 | -2.59230300 |
| H | -6.85196500 | 0.33761500  | -0.36970300 |
| H | -5.26300000 | 0.75878500  | 1.50511400  |
| H | 0.00596500  | 0.36069900  | 2.50263100  |
| H | 3.45024300  | -3.19849700 | 0.76425800  |
| H | 1.19932700  | -2.49007000 | 1.60500700  |
| H | 0.98310100  | 2.31033900  | 0.40994900  |
| H | 2.57292700  | 3.89570200  | -0.68716800 |
| H | 4.82910000  | 3.07065000  | -1.49849600 |
| H | 5.47270000  | 0.68243500  | -1.19277500 |
| H | -2.04060700 | 1.74136800  | 2.79340500  |
| H | -2.26491200 | 0.03873500  | 3.38768000  |
| H | -3.68638000 | 1.00819700  | 2.85268600  |
| H | 5.34315600  | -2.88281700 | -0.29539600 |

|   |            |             |             |
|---|------------|-------------|-------------|
| H | 6.12281200 | -1.28407400 | -0.00066500 |
| H | 5.38370900 | -1.65213700 | -1.61093500 |

TO-3 in the  $S_0$  state

Energy = -1313.1510

|   |             |             |             |
|---|-------------|-------------|-------------|
| C | -7.11326600 | -1.26577900 | -0.00001500 |
| C | -7.30658900 | 0.14603400  | 0.00012800  |
| C | -6.20583900 | 1.04290800  | 0.00016000  |
| C | -4.88476000 | 0.50484200  | 0.00005500  |
| C | -4.70464500 | -0.91445600 | -0.00010000 |
| C | -5.80050200 | -1.81037000 | -0.00013200 |
| N | -3.64418500 | 1.22172500  | 0.00006800  |
| C | -2.49576600 | 0.42663900  | -0.00008300 |
| S | -2.94157000 | -1.34209400 | -0.00028000 |
| C | -1.16456800 | 0.91534500  | -0.00013700 |
| C | -3.55286700 | 2.73036700  | 0.00047600  |
| C | 0.01393800  | 0.11075000  | -0.00007200 |
| C | 1.32284500  | 0.64374900  | -0.00014400 |
| C | 2.56056600  | -0.10645700 | -0.00003900 |
| C | 3.89175100  | 0.56732400  | -0.00005400 |
| C | 5.11673700  | -0.22913400 | 0.00005700  |
| N | 5.03246300  | -1.65032400 | 0.00018100  |
| C | 3.79318200  | -2.26135000 | 0.00017000  |
| C | 2.59617500  | -1.54883700 | 0.00006200  |
| C | 4.04404600  | 2.00193700  | -0.00019200 |
| C | 5.30693600  | 2.61979600  | -0.00021500 |
| C | 6.49116800  | 1.82166300  | -0.00010300 |
| C | 6.40005700  | 0.41820500  | 0.00002900  |
| C | 6.27705200  | -2.51606100 | 0.00026900  |
| H | -7.98177300 | -1.94218100 | -0.00003800 |
| H | -8.32771300 | 0.55761200  | 0.00021100  |
| H | -6.38546700 | 2.12623600  | 0.00026400  |
| H | -5.63763100 | -2.89842200 | -0.00024600 |
| H | -1.03480700 | 2.00752700  | -0.00022700 |
| H | -3.01650300 | 3.07048900  | -0.90708900 |
| H | -3.01639000 | 3.06996900  | 0.90817100  |
| H | -4.56865100 | 3.15284400  | 0.00064300  |
| H | -0.11573800 | -0.98363800 | 0.00006100  |
| H | 1.39009400  | 1.74053700  | -0.00027500 |
| H | 3.80205700  | -3.35855600 | 0.00025000  |
| H | 1.67191200  | -2.13961500 | 0.00004700  |
| H | 3.15421300  | 2.64360400  | -0.00028600 |
| H | 5.37989700  | 3.71831700  | -0.00032200 |

|   |            |             |             |
|---|------------|-------------|-------------|
| H | 7.48293500 | 2.29989700  | -0.00012300 |
| H | 7.32141400 | -0.17595500 | 0.00010400  |
| H | 6.87886900 | -2.31283300 | 0.90729400  |
| H | 6.87886200 | -2.31302300 | -0.90680400 |
| H | 5.95767100 | -3.57178700 | 0.00038500  |

TO-3 in the  $S_1$  state

Energy = -1313.1481

|   |             |             |             |
|---|-------------|-------------|-------------|
| C | -7.12332100 | -1.25233600 | -0.00043600 |
| C | -7.31218000 | 0.16648500  | -0.00044900 |
| C | -6.21620100 | 1.06037400  | -0.00029500 |
| C | -4.88675600 | 0.52156500  | -0.00009300 |
| C | -4.71276700 | -0.91383000 | -0.00016000 |
| C | -5.81416300 | -1.80225700 | -0.00028800 |
| N | -3.66750000 | 1.22830700  | 0.00011400  |
| C | -2.49970600 | 0.41565500  | 0.00019700  |
| S | -2.96407700 | -1.35829400 | 0.00007600  |
| C | -1.18024300 | 0.87849700  | 0.00033600  |
| C | -3.55954400 | 2.73267500  | 0.00033200  |
| C | 0.02037000  | 0.04353700  | 0.00042000  |
| C | 1.30280200  | 0.59199400  | 0.00047500  |
| C | 2.59547200  | -0.14136200 | 0.00048600  |
| C | 3.88560300  | 0.56405700  | 0.00021200  |
| C | 5.13831600  | -0.21192100 | -0.00011300 |
| N | 5.06943900  | -1.63621800 | -0.00000700 |
| C | 3.83870500  | -2.28344200 | 0.00035000  |
| C | 2.63353900  | -1.57866400 | 0.00054800  |
| C | 4.01665200  | 2.00589400  | 0.00021700  |
| C | 5.27735800  | 2.64305900  | -0.00022800 |
| C | 6.47332600  | 1.87201500  | -0.00072500 |
| C | 6.40491300  | 0.45513400  | -0.00067400 |
| C | 6.32820500  | -2.47461400 | -0.00027400 |
| H | -7.99576200 | -1.92319900 | -0.00053400 |
| H | -8.33366300 | 0.57695400  | -0.00059000 |
| H | -6.39317400 | 2.14382200  | -0.00029500 |
| H | -5.65620400 | -2.89089800 | -0.00029100 |
| H | -1.02633000 | 1.96795600  | 0.00039600  |
| H | -3.01649600 | 3.06522100  | -0.90697700 |
| H | -3.01690800 | 3.06498700  | 0.90797400  |
| H | -4.56943600 | 3.16927700  | 0.00015000  |
| H | -0.11541300 | -1.04897800 | 0.00042200  |
| H | 1.35750000  | 1.68996400  | 0.00042700  |
| H | 3.87139300  | -3.37948000 | 0.00040800  |

|   |            |             |             |
|---|------------|-------------|-------------|
| H | 1.71103700 | -2.17299900 | 0.00076800  |
| H | 3.11756300 | 2.63447100  | 0.00057800  |
| H | 5.32930800 | 3.74345000  | -0.00021400 |
| H | 7.45706400 | 2.36640700  | -0.00116000 |
| H | 7.33729300 | -0.12161700 | -0.00105000 |
| H | 6.92866100 | -2.25708200 | 0.90572300  |
| H | 6.92816400 | -2.25726700 | -0.90664700 |
| H | 6.03477500 | -3.53799700 | -0.00008600 |

Cy1 in the  $S_0$  state

Energy = -995.95810191

|   |             |             |             |
|---|-------------|-------------|-------------|
| C | -6.01449200 | -0.61266300 | 0.40621500  |
| C | -6.07503000 | 0.67435300  | -0.19725800 |
| C | -4.88770700 | 1.36438500  | -0.57561300 |
| C | -3.65000100 | 0.71703500  | -0.32476300 |
| C | -3.57092400 | -0.56188200 | 0.28330700  |
| C | -4.75578300 | -1.24238900 | 0.64476900  |
| N | -2.31226300 | 1.18708300  | -0.59904900 |
| C | -1.33964900 | 0.31064800  | -0.12838200 |
| C | -2.07988700 | -0.99702000 | 0.39167100  |
| C | 0.00001200  | 0.80219700  | 0.00011000  |
| C | 1.33967000  | 0.31067300  | 0.12846400  |
| C | -2.05210100 | 2.51287400  | -1.25944800 |
| N | 2.31234600  | 1.18705100  | 0.59911700  |
| C | 3.65003600  | 0.71700400  | 0.32462600  |
| C | 3.57087000  | -0.56188200 | -0.28350300 |
| C | 2.07980500  | -0.99703000 | -0.39156200 |
| C | 4.88778000  | 1.36431400  | 0.57538200  |
| C | 6.07504800  | 0.67429600  | 0.19681500  |
| C | 6.01442000  | -0.61267600 | -0.40674000 |
| C | 4.75567000  | -1.24237400 | -0.64517500 |
| C | 2.05233800  | 2.51276700  | 1.25969500  |
| C | -1.87524100 | -2.25686700 | -0.56039700 |
| C | -1.69075700 | -1.31366600 | 1.89498700  |
| C | 1.69042900  | -1.31411200 | -1.89465200 |
| C | 1.87537600  | -2.25664900 | 0.56099600  |
| H | -6.94459500 | -1.12654200 | 0.69583800  |
| H | -7.05160600 | 1.15240900  | -0.37310700 |
| H | -4.94725200 | 2.36145000  | -1.03310400 |
| H | -4.71754400 | -2.23931600 | 1.11040200  |
| H | -0.00002800 | 1.90054800  | 0.00019200  |
| H | -1.13057300 | 2.44662700  | -1.86512000 |
| H | -1.94725000 | 3.31469600  | -0.49833800 |

|   |             |             |             |
|---|-------------|-------------|-------------|
| H | -2.90122200 | 2.74811000  | -1.92478500 |
| H | 4.94739800  | 2.36136500  | 1.03289500  |
| H | 7.05164900  | 1.15232600  | 0.37259700  |
| H | 6.94447900  | -1.12653800 | -0.69653300 |
| H | 4.71735600  | -2.23926300 | -1.11088200 |
| H | 2.90152000  | 2.74783500  | 1.92502100  |
| H | 1.13085000  | 2.44654900  | 1.86542500  |
| H | 1.94753200  | 3.31470400  | 0.49869700  |
| H | -0.83566600 | -2.62183700 | -0.54943800 |
| H | -2.15357900 | -2.00721100 | -1.60488200 |
| H | -2.53277700 | -3.07772000 | -0.20844800 |
| H | -0.61449500 | -1.54573800 | 1.99356500  |
| H | -2.27197000 | -2.18943200 | 2.24994500  |
| H | -1.92461500 | -0.44865200 | 2.54967400  |
| H | 2.27145800  | -2.19008200 | -2.24942400 |
| H | 1.92433100  | -0.44936200 | -2.54968000 |
| H | 0.61413000  | -1.54606600 | -1.99308900 |
| H | 2.53274300  | -3.07763300 | 0.20904600  |
| H | 0.83576400  | -2.62151200 | 0.55048800  |
| H | 2.15409000  | -2.00666200 | 1.60529700  |

Cy1 in the S<sub>1</sub> state

Energy = -995.9324

|   |             |             |             |
|---|-------------|-------------|-------------|
| C | -5.98234100 | -0.27881400 | 0.49773600  |
| C | -5.76952600 | -1.18824800 | -0.57484600 |
| C | -4.47674600 | -1.35551000 | -1.15265100 |
| C | -3.40910200 | -0.57877200 | -0.62400800 |
| C | -3.60673700 | 0.34090800  | 0.44940800  |
| C | -4.89429700 | 0.49290900  | 1.01276200  |
| N | -2.03417400 | -0.57130700 | -1.01722800 |
| C | -1.25865100 | 0.20947100  | -0.10146300 |
| C | -2.26313600 | 1.06928500  | 0.77266000  |
| C | 0.06715500  | 0.77322500  | -0.57617100 |
| C | 1.33897200  | 0.36100800  | -0.26225700 |
| C | -1.52951800 | -1.36950000 | -2.17669700 |
| N | 2.49047500  | 1.06430800  | -0.81399000 |
| C | 3.69115900  | 0.47908700  | -0.40739700 |
| C | 3.41571300  | -0.65215900 | 0.44554400  |
| C | 1.88724000  | -0.82443600 | 0.62430300  |
| C | 5.03464700  | 0.87158100  | -0.73696800 |
| C | 6.08513900  | 0.10701200  | -0.19618800 |
| C | 5.81981300  | -1.01951100 | 0.65142800  |
| C | 4.48439600  | -1.40047600 | 0.97373400  |

|   |             |             |             |
|---|-------------|-------------|-------------|
| C | 2.39476700  | 2.26552500  | -1.71461400 |
| C | -1.92402200 | 1.04804600  | 2.31701800  |
| C | -2.34230200 | 2.58924700  | 0.28337200  |
| C | 1.42053300  | -2.24673600 | 0.08811300  |
| C | 1.49294400  | -0.66632600 | 2.15612300  |
| H | -6.98789900 | -0.16667500 | 0.93352900  |
| H | -6.61239700 | -1.78014000 | -0.96721400 |
| H | -4.32273300 | -2.06684100 | -1.97697400 |
| H | -5.06788100 | 1.19948800  | 1.84020600  |
| H | -0.00922000 | 1.64190200  | -1.25448300 |
| H | -0.47724700 | -1.10681900 | -2.37629600 |
| H | -2.13413000 | -1.13765200 | -3.07740900 |
| H | -1.59757900 | -2.45800700 | -1.96579400 |
| H | 5.24703900  | 1.73121900  | -1.38434400 |
| H | 7.12612900  | 0.37754400  | -0.42704100 |
| H | 6.66230400  | -1.59766300 | 1.05929800  |
| H | 4.30231500  | -2.26680600 | 1.62600700  |
| H | 3.40784800  | 2.61373400  | -1.96663000 |
| H | 1.84599500  | 3.07141800  | -1.19088100 |
| H | 1.85852000  | 1.98528400  | -2.64187800 |
| H | -0.93823700 | 1.51922700  | 2.51113800  |
| H | -1.90301600 | 0.01091000  | 2.71002600  |
| H | -2.68951300 | 1.61950900  | 2.88422600  |
| H | -1.38482900 | 3.11883700  | 0.47426400  |
| H | -3.14402800 | 3.12255400  | 0.83627800  |
| H | -2.56851300 | 2.65215200  | -0.80212900 |
| H | 1.93112000  | -3.04151900 | 0.66933300  |
| H | 1.67403200  | -2.37474700 | -0.98372500 |
| H | 0.32824600  | -2.36593500 | 0.21796300  |
| H | 2.01229000  | -1.44657100 | 2.74937900  |
| H | 0.40339800  | -0.79601400 | 2.28273700  |
| H | 1.78727400  | 0.32970800  | 2.54528800  |

Cy3 in the  $S_0$  state

Energy = -1072.9171

|   |             |             |             |
|---|-------------|-------------|-------------|
| C | -6.95925200 | -1.28465900 | -0.08188600 |
| C | -7.27312000 | 0.10035200  | 0.00247800  |
| C | -6.24612700 | 1.08507900  | 0.06823400  |
| C | -4.90093300 | 0.63136900  | 0.04642600  |
| C | -4.57061300 | -0.74930300 | -0.04389400 |
| C | -5.59903200 | -1.71644300 | -0.10572600 |
| N | -3.67996600 | 1.40253000  | 0.10284300  |
| C | -2.55554800 | 0.59074000  | 0.03092600  |
| C | -3.02465400 | -0.91540400 | -0.05686800 |

|   |             |             |             |
|---|-------------|-------------|-------------|
| C | -1.24413700 | 1.14109500  | 0.02671700  |
| C | 1.24413400  | 1.14110300  | -0.02665500 |
| C | 0.00000300  | 0.44942400  | 0.00000500  |
| C | 2.55554800  | 0.59074400  | -0.03090500 |
| C | -3.64815300 | 2.90223800  | 0.22233200  |
| N | 3.67996300  | 1.40252900  | -0.10284600 |
| C | 4.90093300  | 0.63136300  | -0.04646000 |
| C | 4.57061200  | -0.74930400 | 0.04389700  |
| C | 3.02465100  | -0.91540300 | 0.05690600  |
| C | 6.24612400  | 1.08507500  | -0.06835300 |
| C | 7.27312000  | 0.10035100  | -0.00261400 |
| C | 6.95925300  | -1.28465800 | 0.08180200  |
| C | 5.59903600  | -1.71644300 | 0.10570400  |
| C | -2.55389000 | -1.60029300 | -1.41290300 |
| C | -2.54962200 | -1.75599600 | 1.20756400  |
| C | 2.54960400  | -1.75605000 | -1.20747200 |
| C | 2.55390500  | -1.60023100 | 1.41298600  |
| C | 3.64815500  | 2.90224200  | -0.22229700 |
| H | -7.76967300 | -2.02880500 | -0.13125400 |
| H | -8.32579000 | 0.42430900  | 0.01693200  |
| H | -6.50790500 | 2.15028100  | 0.13086000  |
| H | -5.36239900 | -2.78968700 | -0.17336900 |
| H | -1.17472800 | 2.23944700  | 0.04474900  |
| H | 1.17473000  | 2.23945600  | -0.04462900 |
| H | 0.00001300  | -0.64567500 | -0.00003300 |
| H | -3.01882600 | 3.19466600  | 1.08551000  |
| H | -4.67248900 | 3.27293900  | 0.38557700  |
| H | -3.24084000 | 3.35067600  | -0.70662600 |
| H | 6.50789200  | 2.15027600  | -0.13104000 |
| H | 8.32579000  | 0.42430500  | -0.01712700 |
| H | 7.76967600  | -2.02880400 | 0.13115400  |
| H | 5.36240500  | -2.78968600 | 0.17337800  |
| H | -1.45254100 | -1.70501600 | -1.45229800 |
| H | -2.88435500 | -1.00593000 | -2.28988400 |
| H | -3.00109600 | -2.61284100 | -1.48642700 |
| H | -1.45004700 | -1.88090200 | 1.22157300  |
| H | -3.01133400 | -2.76394400 | 1.17011000  |
| H | -2.86218400 | -1.26103200 | 2.15027500  |
| H | 3.01130200  | -2.76400300 | -1.16996600 |
| H | 2.86216700  | -1.26114200 | -2.15021200 |
| H | 1.45002800  | -1.88095000 | -1.22147900 |
| H | 3.00110800  | -2.61277900 | 1.48654600  |
| H | 1.45255400  | -1.70494300 | 1.45239400  |
| H | 2.88438600  | -1.00582900 | 2.28993300  |

|   |            |            |             |
|---|------------|------------|-------------|
| H | 4.67251800 | 3.27295000 | -0.38535800 |
| H | 3.24070400 | 3.35064500 | 0.70661600  |
| H | 3.01895500 | 3.19469300 | -1.08556100 |

Cy3 in the  $S_1$  state

Energy = -1072.9129

|   |             |             |             |
|---|-------------|-------------|-------------|
| C | 7.04839100  | -1.15815600 | 0.00268000  |
| C | 7.30836000  | 0.24845300  | -0.00037000 |
| C | 6.25253800  | 1.19157100  | -0.00252700 |
| C | 4.90927800  | 0.68902300  | -0.00152700 |
| C | 4.63768100  | -0.72667600 | 0.00145000  |
| C | 5.70450800  | -1.64621100 | 0.00361000  |
| N | 3.69291600  | 1.40006000  | -0.00326400 |
| C | 2.56840600  | 0.51473100  | -0.00119800 |
| C | 3.10219500  | -0.96300800 | 0.00163500  |
| C | 1.24786100  | 1.01812800  | -0.00110700 |
| C | -1.24785800 | 1.01812300  | 0.00156700  |
| C | 0.00000200  | 0.30387700  | 0.00022800  |
| C | -2.56840500 | 0.51472500  | 0.00151600  |
| C | 3.58541000  | 2.89564600  | -0.00702000 |
| N | -3.69290900 | 1.40005600  | 0.00338900  |
| C | -4.90927600 | 0.68902400  | 0.00139900  |
| C | -4.63768500 | -0.72667400 | -0.00151900 |
| C | -3.10219900 | -0.96301300 | -0.00134300 |
| C | -6.25253300 | 1.19157900  | 0.00205900  |
| C | -7.30836000 | 0.24846600  | -0.00040800 |
| C | -7.04839500 | -1.15814400 | -0.00341900 |
| C | -5.70451500 | -1.64620500 | -0.00398400 |
| C | 2.66271700  | -1.75860600 | 1.31247200  |
| C | 2.66332200  | -1.76320100 | -1.30668800 |
| C | -2.66361500 | -1.76314000 | 1.30712100  |
| C | -2.66244100 | -1.75868300 | -1.31204000 |
| C | -3.58539400 | 2.89564300  | 0.00712900  |
| H | 7.88898200  | -1.86935300 | 0.00433900  |
| H | 8.34927100  | 0.60849300  | -0.00105200 |
| H | 6.47072100  | 2.26832600  | -0.00482900 |
| H | 5.51581300  | -2.73097100 | 0.00588600  |
| H | 1.14986700  | 2.11532100  | -0.00201700 |
| H | -1.14986800 | 2.11531600  | 0.00250900  |
| H | 0.00000500  | -0.79087700 | 0.00014200  |
| H | 3.04026000  | 3.23386400  | -0.91257500 |
| H | 4.59586200  | 3.33416700  | -0.00962300 |
| H | 3.04288200  | 3.23880400  | 0.89826500  |
| H | -6.47071300 | 2.26833500  | 0.00431500  |



|   |             |             |             |
|---|-------------|-------------|-------------|
| H | -8.34926800 | 0.60851000  | -0.00000600 |
| H | -7.88899000 | -1.86933700 | -0.00532400 |
| H | -5.51582400 | -2.73096600 | -0.00622700 |
| H | 1.56690700  | -1.91567500 | 1.33681700  |
| H | 2.96239400  | -1.20594500 | 2.22692800  |
| H | 3.15589800  | -2.75256400 | 1.32400600  |
| H | 1.56751400  | -1.92036300 | -1.33101200 |
| H | 3.15655100  | -2.75717700 | -1.31452400 |
| H | 2.96342600  | -1.21369800 | -2.22290400 |
| H | -3.15685800 | -2.75711000 | 1.31490500  |
| H | -2.96391000 | -1.21358400 | 2.22324100  |
| H | -1.56781500 | -1.92031500 | 1.33169000  |
| H | -3.15561500 | -2.75264500 | -1.32362200 |
| H | -1.56662600 | -1.91574700 | -1.33614500 |
| H | -2.96192800 | -1.20607600 | -2.22659200 |
| H | -4.59584300 | 3.33417200  | 0.00947600  |
| H | -3.04265200 | 3.23876900  | -0.89803900 |
| H | -3.04045000 | 3.23388000  | 0.91280200  |

Cy5 in the  $S_0$  state

Energy = -1149.8536

|   |             |             |             |
|---|-------------|-------------|-------------|
| C | 8.10661800  | -1.49116600 | 0.00661600  |
| C | 8.48760600  | -0.12018900 | -0.00393900 |
| C | 7.50844200  | 0.91423900  | -0.01039200 |
| C | 6.14419100  | 0.52092700  | -0.00565800 |
| C | 5.74583600  | -0.84283200 | 0.00514100  |
| C | 6.72707900  | -1.85980200 | 0.01119700  |
| N | 4.97196300  | 1.36110200  | -0.01033300 |
| C | 3.80080800  | 0.60883700  | -0.00238400 |
| C | 4.19371900  | -0.92643000 | 0.00869000  |
| C | 2.50673300  | 1.19572800  | -0.00337500 |
| C | 3.68596000  | -1.65510500 | 1.32896100  |
| C | 3.68069800  | -1.67672800 | -1.29734500 |
| C | 5.10748800  | 2.85914700  | -0.02177500 |
| C | 1.24935400  | 0.52904500  | -0.00048500 |
| C | -0.00288200 | 1.20427100  | -0.00090400 |
| C | -1.24950900 | 0.52209400  | 0.00041000  |
| C | -2.51278100 | 1.18119300  | 0.00190600  |
| C | -3.80293800 | 0.58804800  | 0.00221600  |
| N | -4.96030900 | 1.35958900  | 0.01060800  |
| C | -6.14816200 | 0.53922400  | 0.00498700  |
| C | -5.76443300 | -0.83125900 | -0.00513300 |
| C | -4.21275700 | -0.93804500 | -0.00774400 |
| C | -7.51066200 | 0.93940100  | 0.00820200  |

|   |             |             |             |
|---|-------------|-------------|-------------|
| C | -8.49858900 | -0.08645600 | 0.00149800  |
| C | -8.13111200 | -1.46075800 | -0.00799700 |
| C | -6.75467700 | -1.83926000 | -0.01133900 |
| C | -3.70820700 | -1.69362900 | 1.29846200  |
| C | -3.71180800 | -1.67474400 | -1.32607600 |
| C | -4.98389500 | 2.86376200  | 0.02397600  |
| H | 8.88046700  | -2.27485600 | 0.01144500  |
| H | 9.55494700  | 0.15206700  | -0.00723900 |
| H | 7.81245000  | 1.97025900  | -0.01848700 |
| H | 6.44062400  | -2.92297000 | 0.01946200  |
| H | 2.45510200  | 2.29483100  | -0.00761500 |
| H | 2.58100200  | -1.71572100 | 1.36190000  |
| H | 4.03749400  | -1.11897400 | 2.23480900  |
| H | 4.08991000  | -2.68801300 | 1.35411600  |
| H | 2.57575700  | -1.74021400 | -1.32345500 |
| H | 4.08657100  | -2.70913400 | -1.30818800 |
| H | 4.02646900  | -1.15424300 | -2.21329700 |
| H | 4.11826300  | 3.33979900  | -0.03084400 |
| H | 5.66969400  | 3.16555600  | -0.92694900 |
| H | 5.66090000  | 3.18082000  | 0.88362600  |
| H | 1.21149500  | -0.57025700 | 0.00151200  |
| H | -0.00611200 | 2.30957100  | -0.00224900 |
| H | -1.20639900 | -0.57750300 | 0.00120300  |
| H | -2.47457700 | 2.28147000  | 0.00364200  |
| H | -7.81271500 | 1.99588500  | 0.01562700  |
| H | -9.56308900 | 0.19672500  | 0.00373200  |
| H | -8.91164800 | -2.23773300 | -0.01298300 |
| H | -6.47601300 | -2.90454700 | -0.01882300 |
| H | -4.12218600 | -2.72283900 | 1.30926300  |
| H | -4.04963900 | -1.16839100 | 2.21446600  |
| H | -2.60358300 | -1.76555100 | 1.32433400  |
| H | -4.12307900 | -2.70484700 | -1.34894900 |
| H | -2.60707000 | -1.74305800 | -1.35781400 |
| H | -4.05869400 | -1.13824600 | -2.23348100 |
| H | -6.02973400 | 3.20847500  | 0.04617600  |
| H | -4.49153600 | 3.25834200  | -0.88750600 |
| H | -4.45936200 | 3.24139000  | 0.92436500  |

Cy5 in the  $S_1$  state

Energy = -1149.8516

|   |             |             |             |
|---|-------------|-------------|-------------|
| C | -8.30648100 | -1.20204300 | 0.00045800  |
| C | -8.56620400 | 0.20261300  | -0.00042700 |
| C | -7.50843600 | 1.14640300  | -0.00092500 |

|   |             |             |             |
|---|-------------|-------------|-------------|
| C | -6.16842400 | 0.64320400  | -0.00053600 |
| C | -5.89615600 | -0.76833800 | 0.00040900  |
| C | -6.96281700 | -1.68954500 | 0.00090100  |
| N | -4.94597700 | 1.35662800  | -0.00093600 |
| C | -3.82770700 | 0.47797700  | -0.00027800 |
| C | -4.35994400 | -1.00228200 | 0.00067100  |
| C | -2.50587700 | 0.97606600  | -0.00046300 |
| C | -3.91904100 | -1.79759700 | -1.30897700 |
| C | -3.91916100 | -1.79594200 | 1.31131800  |
| C | -4.84075600 | 2.85335400  | -0.00204600 |
| C | -1.26498400 | 0.24894200  | 0.00010500  |
| C | -0.00001400 | 0.90621600  | 0.00010000  |
| C | 1.26500200  | 0.24896800  | 0.00036500  |
| C | 2.50585600  | 0.97610100  | 0.00062500  |
| C | 3.82771800  | 0.47801500  | 0.00055800  |
| N | 4.94597000  | 1.35664500  | 0.00113000  |
| C | 6.16843500  | 0.64320600  | 0.00037500  |
| C | 5.89614900  | -0.76832000 | -0.00049500 |
| C | 4.35994200  | -1.00225400 | -0.00031300 |
| C | 7.50845000  | 1.14637700  | 0.00044500  |
| C | 8.56620300  | 0.20256800  | -0.00049200 |
| C | 8.30646300  | -1.20208400 | -0.00139300 |
| C | 6.96279000  | -1.68955500 | -0.00137900 |
| C | 3.91882400  | -1.79606100 | -1.31077800 |
| C | 3.91939500  | -1.79742500 | 1.30952800  |
| C | 4.84076800  | 2.85337700  | 0.00221500  |
| H | -9.14669100 | -1.91381100 | 0.00081700  |
| H | -9.60674800 | 0.56385500  | -0.00072700 |
| H | -7.72675900 | 2.22320700  | -0.00158900 |
| H | -6.77301600 | -2.77415800 | 0.00159700  |
| H | -2.39759300 | 2.07231700  | -0.00102300 |
| H | -2.82280900 | -1.95301600 | -1.33392300 |
| H | -4.21996400 | -1.24646200 | -2.22394300 |
| H | -4.41086600 | -2.79220100 | -1.31933100 |
| H | -2.82292500 | -1.95129300 | 1.33656200  |
| H | -4.41094700 | -2.79055200 | 1.32286100  |
| H | -4.22018800 | -1.24369400 | 2.22558000  |
| H | -4.29751900 | 3.19487200  | 0.90317100  |
| H | -5.85206100 | 3.28978600  | -0.00223600 |
| H | -4.29773700 | 3.19353000  | -0.90790000 |
| H | -1.26554100 | -0.85099500 | 0.00052600  |
| H | -0.00002400 | 2.01251800  | -0.00011800 |
| H | 1.26557100  | -0.85096800 | 0.00039400  |
| H | 2.39756300  | 2.07235300  | 0.00085000  |

|   |            |             |             |
|---|------------|-------------|-------------|
| H | 7.72681500 | 2.22317300  | 0.00110800  |
| H | 9.60675100 | 0.56380200  | -0.00051300 |
| H | 9.14666100 | -1.91386400 | -0.00212100 |
| H | 6.77296200 | -2.77416400 | -0.00207900 |
| H | 4.41063200 | -2.79065900 | -1.32234900 |
| H | 4.21960700 | -1.24389300 | -2.22516900 |
| H | 2.82258800 | -1.95143600 | -1.33572000 |
| H | 4.41124100 | -2.79201800 | 1.31985300  |
| H | 2.82317100 | -1.95286400 | 1.33478600  |
| H | 4.22055300 | -1.24619200 | 2.22435800  |
| H | 5.85207400 | 3.28980000  | 0.00318300  |
| H | 4.29710200 | 3.19350400  | 0.90769200  |
| H | 4.29819400 | 3.19496600  | -0.90337900 |
